# Supplementary material
Source: MDPI journal article supplement (https://www.mdpi.com/2073-4344/9/6/492)
Supplement: s1 [file s1]

# Supplementary Materials: Sulfur Poisoning Effects on Modern Lean NO<sub>x</sub> Trap Catalysts Components

Jesus Emmanuel De Abreu Goes, Annika Kristoffersson and Louise Olsson \*

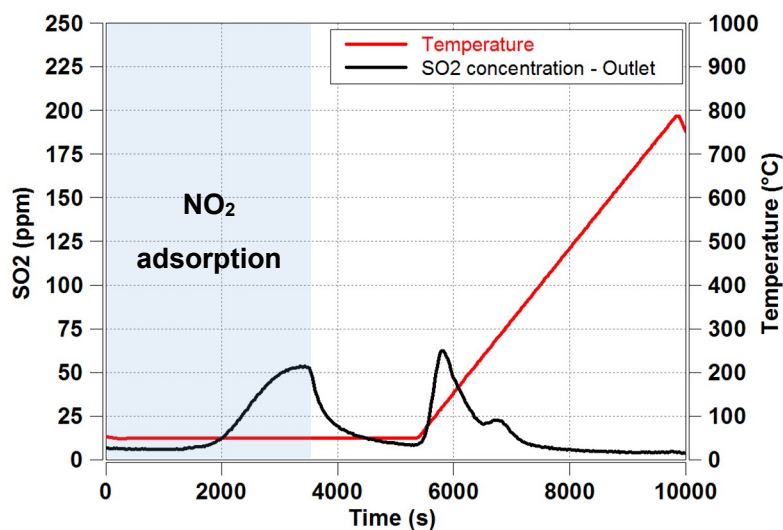

Figure S1. SO<sub>2</sub> desorption profile during TPD2 for Pt/Al<sub>2</sub>O<sub>3</sub>.
